1

2 ***AEDES ALBOPICTUS* (SKUSE) SUSCEPTIBILITY STATUS TO AGROCHEMICAL-**  
3 **INSECTICIDES USED IN DURIAN PLANTATING SYSTEMS IN SOUTHERN**  
4 **THAILAND**

5

6 **Sakda Ratisupakorn<sup>1</sup>, Sokchan Lorn<sup>1</sup>, Nsa Dada<sup>1,2</sup>, Aran Ngampongsai<sup>1</sup>, Pawit Chaivisit<sup>3</sup>,**  
7 **Wanapa Ritthison<sup>4</sup>, Krajana Tainchum<sup>1,5</sup>**

8

9 <sup>1</sup>Agricultural Innovation and Management Division, Faculty of Natural Resources, Prince of  
10 Songkla University, 90112 Thailand.

11 <sup>2</sup>Faculty of Science and Technology, Norwegian University of Life Sciences, 1430 Aas, Norway

12 <sup>3</sup>The Office of Disease Prevention and Control, Region 11 Nakhon Si Thammarat, Maung  
13 Nakhon Si Thammarat, 80000, Thailand.

14 <sup>4</sup>The Office of Disease Prevention and Control, Region 3 Chonburi, Muang Chonburi, 20000,  
15 Thailand

16 <sup>5</sup>Corresponding author, e-mail: rounqson09@hotmail.com, Phone: (66)74-286-104 Fax: 66(0)-  
17 7428-6961

18

19

## ABSTRACT

20 High rates of dengue, chikungunya, and zika morbidity occur in southern Thailand. The intensive  
21 application of insecticides in orchards could impact not only agricultural insect pests, but also  
22 non-target insects, such as mosquitoes, or non-target beneficial insects. In this study, the  
23 population density and insecticide susceptibility of *Aedes albopictus* populations to field  
24 application concentrations of four agrochemical insecticides – cypermethrin, chlorpyrifos,  
25 carbaryl, and imidacloprid were examined. Mosquito eggs were collected from durian cultivation  
26 sites in five provinces in southern Thailand and hatched and allowed to develop to the adult  
27 stage. The study sites were categorized into three groups based on insecticide application;  
28 intensive-application of insecticides (IA), less-application of insecticides (LA), and no  
29 application of insecticides (NA). Twenty ovitraps were deployed for at least three consecutive  
30 days at each study site to collect mosquito eggs and to determine the *Ae. albopictus* population  
31 density then WHO tube assays being used to determine the susceptibility of adult mosquitoes to  
32 selected insecticides. This study represents the first report of the agrochemical insecticide  
33 susceptibility status of *Ae. albopictus* collected from durian orchards in southern Thailand. The  
34 study found that the populations of *Ae. albopictus* were susceptible to chlorpyrifos, but showed  
35 reduced mortality following exposure to lambda-cyhalothrin, carbaryl, and imidacloprid which is  
36 suggestive of the existence of resistance. These findings provide new insights into mosquito  
37 insecticide resistance focusing on *Ae. albopictus* populations and has important implications for  
38 mosquito and mosquito-borne disease control in Thailand as well as providing baseline data on  
39 which future studies can develop.

40 **Keywords:** *Aedes albopictus*, insecticide resistance, durian, agrochemical, Thailand

41

42  
43  
44  
45  
46  
47  
48  
49  
50  
51  
52  
53  
54  
55  
56  
57  
58  
59  
60  
61  
62  
63  
64

## INTRODUCTION

The viruses responsible for dengue, chikungunya, and zika are spread by mosquitoes and result in high morbidity and mortality rates every year (Thavara et al. 2009; DDC 2018). *Aedes albopictus* (Skuse) (Diptera: Culicidae), the Asian tiger mosquito, which is the vector for all these insect-borne diseases, is most commonly found in tropical and subtropical regions in both suburban and rural areas where there are open spaces with considerable vegetation (Ponlawat et al. 2005). Female *Ae. albopictus* are closely associated with activities in people's daily life since they are present in houses and around the cultivation areas close to them, and they are common in rubber plantations as well as other tropical fruit orchards (Sullivan et al. 1971; Thammapalo et al. 2009; Tangena et al. 2016).

Tropical fruit orchards are widely cultivated in the southern region of Thailand (Tantrakonnsab and Tantrakoonsab 2018). Durian orchards are one of the most common types in southern Thailand, and numerous commercial durian growers enhance their harvest by the intensive application of agrochemical insecticides. The use of insecticides in durian orchards is especially common during off-season planting, and allows the fruits to grow gradually throughout the year. Different groups of insecticides, and different concentrations to be applied, are recommended for durian cultivation. They include; organophosphates (chlorpyrifos, methidathion), pyrethroids (lambda-cyhalothrin, cypermethrin), carbamates (carbaryl, carbosulfan), and amitraz (Wanwimolruk et al. 2015). The continuous and widespread use of agrochemical–insecticides in the durian planting system can lead to insect populations in the area, including non-target insect pests like mosquitoes (Overgaard 2006; Overgaard et al. 2005), becoming less susceptible to insecticides.

65           The resistance of mosquitoes to several chemicals approved for public health use has  
66 long been reported in Thailand (Chareonviriyahpap et al. 1999; Overgaard 2006;  
67 Chareonviriyaphap et al. 2013; Corbel et al. 2016). *Aedes albopictus* larvae in Phatthalung  
68 showed resistance to permethrin, while, adults in Songkhla were found to remain susceptible to  
69 deltamethrin, permethrin, fenitrothion, and propoxur (Pethuan et al. 2007) and Chuaycharoensuk  
70 et al. (2011) reported the susceptibility of adult *Ae. albopictus* from rubber plantation areas in  
71 Sadao, Songkhla to deltamethrin. Agricultural areas represent good habitats for mosquito  
72 development, and the intensive use of insecticides for crop protection and the use of other  
73 agrochemicals in those areas may contribute to the selection of insecticide resistance genes.  
74 However, mosquito populations in agricultural areas generally remain susceptible to pyrethroids,  
75 and pyrethroid-resistance does not presently pose a direct threat to vector control. Nevertheless,  
76 increased use of pyrethroids in agriculture may cause problems for vector control in future  
77 (Overgaard et al. 2005).

78           Because of the reported spread of insecticide resistance across different geographic  
79 locations in Thailand, an evaluation of insecticide use is needed. Moreover new insecticides  
80 which can be used as alternatives to those currently employed, and perhaps a change in the  
81 application regimens of currently used insecticides may be required to combat the threat posed  
82 by resistant mosquito strains, along with a system for monitoring the effectiveness of insecticides  
83 by local communities. Rotation systems for switching from one insecticide to another can also be  
84 designed so that the development of insecticide resistance in mosquito populations can be  
85 prevented. Cross-resistance or resistance to different insecticides approved for public health and  
86 agricultural use should also be considered when decisions are made relating to vector control.

87           The increasing number of dengue cases in Thailand may be in part due to failed dengue  
88 control efforts which can result from many factors other than insecticide resistance. However, in  
89 areas where insecticide resistance is a problem, the use of physiological or biological controls  
90 should be considered as an alternative to the use of insecticides (Jirakanjanakit et al. 2007a;  
91 Jirakanjanakit et al. 2007b; Pethuan et al. 2007).

92           Since 2016, the number of dengue cases has continued to increase, reaching high levels  
93 that have never before been recorded in southern Thailand (DDC 2018) and several hypotheses  
94 have been advanced to explain this phenomenon. These include the ineffectiveness of dengue  
95 vector control, poor self-protection against mosquito bites by those living in dengue-endemic  
96 areas, and the reduced susceptibility of mosquitoes to insecticides (Limkittikul et al. 2014). Thus,  
97 the insecticide susceptibility of *Ae. Albopictus*, which commonly breeds in orchard areas, needs  
98 to be evaluated. Some groups of insecticides, which share similar modes of action, are  
99 commonly used both by the public health authorities for vector control, as well as in durian  
100 plantations to control insect pests. Thus, the development of resistance populations to pesticides  
101 used in durian plantations in *Ae. albopictus* may lead to cross-resistance to public health  
102 insecticides. The study reported in this paper was conducted in order to investigate whether this  
103 was the case in southern Thailand. The specific objectives of the present study were to determine  
104 the density of *Ae. albopictus* in the durian planting system in southern Thailand, characterize the  
105 type and quantity of insecticides used, determine the insecticide resistance status of *Ae.*  
106 *albopictus* to frequently used agrochemical-insecticides in the area, and further, to characterize  
107 peoples' attitudes to the impacts of mosquitoes and mosquito control efforts in the region.

108

109

110

## MATERIALS AND METHODS

### 111 **Study area**

112 A total of 22 durian orchards in southern Thailand were surveyed and were classified by  
113 the frequency of insecticide application, as follows: intensive-application of insecticides (IA) for  
114 sites where insecticides were applied every 7-15 days (n = 12), less-application of insecticides  
115 (LA) for sites where insecticides were applied for 15 consecutive days once or twice a year (n =  
116 3), and (NA) for sites with no application of insecticides (n = 7). The 22 durian orchards  
117 included were variously located in Chumphon (CHU), Nakhorn Si Thammarat (NAK),  
118 Phatthalung (PHA), Satun (SAT), and Songkhla (SON) provinces, and convenience sampling  
119 was used to recruit eligible participants, who were the cultivators at the orchards. Each cultivator  
120 gave permission for the study site to be accessed and samples of the mosquito eggs and immature  
121 stages to be collected. A questionnaire-based survey was then used to collect information  
122 regarding the type, frequency, and quantity of insecticides used in each orchard surveyed. Each  
123 study site was georeferenced by GPS based on its coordinates and its location was mapped using  
124 Google Maps (Figure 1). The coordinates for each location are presented in Table 1.

### 125 **Mosquito collection**

126 At each study site, eggs of *Ae. albopictus*, as well as all immature stages present, were  
127 collected using ovitraps consisting of a black plastic cup of 15 cm diameter and 10 cm height  
128 lined with a piece of cotton fabric (6 x 45 cm) to provide an ovipositional site. The cup was filled  
129 with approximately 150 ml of filtered tap water and four small holes were drilled into the top of  
130 the cup to allow it to drain, especially during rainy season egg collection. At each durian orchard  
131 study site, twenty ovitraps were randomly placed on the ground, 3 m apart for a period of three to  
132 five days. Each trap was labeled with a trap number and trap position. Environmental

133 information was observed and noted. After three to five days, the traps and the water in each trap  
134 were collected and brought back to the laboratory. The eggs on the fabric were counted and the  
135 number per trap recorded before hatching. Then, the larvae were raised at a density of 150/1,000  
136 ml of well water in plastic trays (30 x 20 x 12 cm). The larvae were fed with fish food (Sakura, U  
137 Lek Trading Co., Ltd., Bangkok, Thailand) once a day until the pupal stage. The pupae were  
138 counted and collected daily and placed into a mesh cage to allow the adult eclosion. The adults  
139 were reared in a mesh cage (30 x 30 x 30 cm) at the Agricultural Innovation and Management  
140 Division, Prince of Songkla University under the following laboratory conditions:  $25 \pm 2$  °C, 80  
141 % RH and they were sustained on cotton soaked in 10 % sugar solution (in water). They were  
142 morphologically identified to species using a stereomicroscope.

#### 143 **Mosquito populations used for agrochemical insecticide susceptibility test**

144 ***Aedes albopictus* susceptible strain:** The eggs of a laboratory strain of *Ae. albopictus*  
145 were obtained from the Department of Entomology, Kasetsart University, Bangkok. This strain  
146 was originally from the Ministry of Public Health Thailand. This population had been  
147 continuously reared under laboratory conditions for over 50 generations with the adults being  
148 sustained on blood using artificial membrane feeding (Yaya and Tainchum 2017) to generate  
149 sufficient numbers of mosquitoes for insecticide susceptibility bioassays.

150 ***Aedes albopictus* field populations:** Immature mosquitoes collected from the orchards  
151 were mass reared as described above. Female mosquitoes aged three to five days were starved  
152 for 24 hours before insecticide susceptibility testing. Only first to fifth (F<sub>1</sub>-F<sub>5</sub>) generation females  
153 were used and mixed in tests to be representative of the field population.

154 ***Aedes aegypti* susceptible strain:** The eggs of a laboratory strain of *Ae. aegypti* (USDA),  
155 which originated from the Center for Medical, Agricultural, and Veterinary Entomology,

156 Gainesville, FL, was obtained from the Department of Entomology, Kasetsart University,  
157 Bangkok. This population had been continuously reared in a laboratory for over 50 generations.

### 158 **Preparation of agrochemical insecticides**

159 Based on the information obtained from the questionnaires regarding the type of  
160 agrochemical insecticides used in the selected durian orchards, the most frequently used  
161 agrochemical insecticides recorded were pyrethroid, organophosphate, carbamate, and  
162 neonicotinoid. The commercial form of these insecticides used against durian insect pests, along  
163 with their field application rates according to the product label, was used for bioassays. They  
164 comprised; chlorpyrifos (touchban®, 40 % EC, produced by Pro Enterprise Co., Ltd., Nakhon  
165 Chai Si, Nakhon Pathom, 60 ml/water 20 L), lambda-cyhalothrin (Karate® 2.5 EC, 2.5 % EC,  
166 produced by Syngenta Crop Protection Co., Ltd., Mueang, Samut Prakan, 25 ml/water 20 L),  
167 carbaryl (Sethrin 85®, 85 % WP, produced by Muang Thong Agriculture Co., Ltd., Lam Luk  
168 Ka, Pathumthani, 20 g/water 20 L), and imidacloprid (Pidofin®, 10 % SL, produced by SPKG  
169 Biokem Co., Ltd., Phutthamonthon, Nakhon Pathom, 10 ml/water 20 L). Tap water was used as a  
170 diluent and as a negative control.

### 171 **Insecticide-treated filter paper**

172 Insecticide-treated papers were made at the Pest Management Laboratory, Agricultural  
173 Innovation and Management Division, Prince of Songkla University, based on the standard  
174 procedure and specifications of the World Health Organization (WHO, 2016). Insecticide-treated  
175 papers for each insecticide were prepared using Whatman® No.1, 12 x 15 cm size. The papers  
176 were treated at a rate of 2 ml of insecticide solution per sheet. Control papers were prepared in  
177 the same manner but impregnated with only 2 ml of tap water.

178



179 **WHO susceptibility tests**

180 The insecticide susceptibility status of the *Ae. albopictus* laboratory and field strains were  
181 tested using WHO susceptibility test kits according to the WHO protocol (WHO 2016). Each set  
182 of a test kit for both treatment and control contained a pair of exposure tubes, one marked with a  
183 red dot for the insecticide-treated paper (acetone-treated paper for control) and a holding tube  
184 marked with a green dot for the untreated paper. Twenty-five three- to five-day-old, starved  
185 female *Ae. albopictus* were introduced into each respective holding tube and held for five  
186 minutes to allow the mosquitoes to adjust to the holding tubes. All the mosquitoes were  
187 subsequently exposed for 60 minutes to either treated or control paper surfaces in the exposure  
188 tubes. The number of mosquitoes knocked down in each test was recorded at 60 minutes, and all  
189 the specimens were subsequently transferred into clean holding tubes and provided with 10 %  
190 sucrose cotton pads. Four replications for each insecticide and control were performed. The  
191 mortality of the treatment and control mosquitoes were recorded after 24 hours post-exposure.

192 **Comparison between the susceptibility of *Aedes* mosquitoes to pyrethroid agrochemical  
193 and public health insecticides**

194 Pyrethroid insecticide is the most commonly used public health insecticide for mosquito  
195 control and management. Two concentrations of lambda-cyhalothrin based on the agricultural  
196 application rate (0.001 g a.i. /m<sup>2</sup>) and the public health rate (0.01 g a.i./m<sup>2</sup>) were used to  
197 determine the susceptibility status of *Aedes* mosquitoes. The impregnation of the filter papers  
198 and insecticide susceptibility tests were performed as described above.

199 **Data analysis**

200 Data from the questionnaires were recorded on a spreadsheet and analyzed using  
201 Microsoft Excel software (Excel® 2013). Descriptive statistics comprising means, percentages,

202 and ranges were computed. In each study location, the patterns associated with the participant's  
203 responses were identified. Mosquito density comparisons between each durian insecticide  
204 application system were performed using Scheffe's multiple range test with the significance level  
205 set at  $P < 0.05$ . The susceptibility of mosquitoes to each insecticide was assessed. The mortality  
206 rates observed in the test and control groups were calculated according to WHO guidelines  
207 (WHO 2016).

## 208 **RESULTS**

### 209 **Insecticide types and quantity used in durian planting systems in southern Thailand**

210 As shown in Table 2, the majority (63.64 %) of the 22 durian cultivators surveyed was  
211 between 51 and 75 years old, and most (81.82 %) were male. Their highest education levels were  
212 primary, 45.45 %, secondary, 22.73 %, and Bachelor's degree, 31.82 %, and most (90.91 %) of the  
213 respondents were farmers with the remaining 9.09 %, being government employees or officers. The  
214 form of agriculture practiced was largely polyculture (77.27 %) with 22.73 % practicing monoculture.  
215 Both forms of culture employed cultivation areas of at least 2 rai. Within the 22 orchards surveyed, the  
216 most common distance between trees was 6-10 m (81.82 %). Of all the cultivators surveyed, 68.18 %  
217 used insecticides, and the highest frequency of insecticide use per month was every 6-10 days (60.00  
218 %), followed by 10-15 days (20.00 %), and over 15 days (20.00 %). Only 3 (13.64 %) of the durian  
219 cultivators comprising the owners of CHU 5 (IA area), SON 1 (LA area), and SON 3 (LA area),  
220 reported having been sick due to a mosquito-borne disease (dengue, chikungunya, and zika viruses) in  
221 each case having contracted dengue fever.

222

223

## 224 **Insecticides used to insect pest control in durian plantations**

225 As shown in Table 3, the use of various groups of insecticides was recorded in the  
226 different durian insecticide application systems. Out of a total of 17 recorded users, a  
227 combination of organophosphate and pyrethroid insecticides was most common, accounting for  
228 29.41 %, followed by pyrethroids (17.64 %), carbamates (17.64 %), organophosphates (11.76  
229 %), neonicotinoids (11.76 %), pyridazinone (5.88 %) and avermectin (5.88 %). The frequency of  
230 spraying for each of these insecticides was 7-15 days per month.

## 231 **Determining the density of *Ae. albopictus* in durian planting systems of southern Thailand**

232 Figure 2 shows the number of mosquito eggs per trap along with the Scheffe multiple  
233 range test results comparing the number of eggs per trap between orchards. In the three durian  
234 insecticide application systems, IA, LA, and NA, the mean number of eggs per trap ranged from  
235 4.40-63.70, 10.00-50.35 and 6.16-115.20, respectively, and significant differences between  
236 durian plantations ( $P < 0.05$ ) were found as shown in Figure 2. The site with the most mosquito  
237 eggs was PHA 1 ( $115.20 \pm 12.83$ ) followed by PHA 2 ( $73.25 \pm 21.49$ ) among the NA  
238 classification, and PHA 3 ( $63.70 \pm 10.69$ ) among the IA classification. However, no mosquito  
239 eggs were collected from 58.33 % of the IA orchards. In addition, the mean number of pupae  
240 collected from the three durian insecticide application systems, IA, LA, and NA, were in the  
241 range of 2.05-26.20, 1.42-39.80, and 10.05-39.60, respectively. The three durian cultivation sites  
242 with the highest number of pupae were SAT 4 (26.20), SON 1 (39.80), and SAT 5 (39.60). The  
243 three sites with the lowest numbers of pupae were PHA 3, SON 3, and SON 2. All of the eggs  
244 collected from NAK 5 and PHA 2 either failed to hatch or did not develop to the pupal stage  
245 (Figure 3).

246 **Susceptibility of *Ae. albopictus* to frequently used agrochemical-insecticides in durian**  
247 **planting systems**

248 The susceptibility tests conducted on laboratory strains of *Ae. aegypti* and *Ae. albopictus*,  
249 as well as on field-collected *Ae. Albopictus* mosquitoes, revealed variation in the proportions of  
250 knockdown insects and mortality between both insecticides and study sites. The proportion of  
251 laboratory (NIH) and field strains of *Ae. albopictus* knocked down, as well as laboratory *Ae.*  
252 *aegypti* strain (USDA) following 60 minutes of exposure to field application concentrations of  
253 chlorpyrifos, lambda-cyhalothrin, carbaryl, and imidacloprid are shown in Table 4. The  
254 mosquitoes used as controls were all alive after bioassay with 0 % knockdown. Overall the  
255 percentage knockdown from highest to lowest percentage was imidacloprid < carbaryl < lambda-  
256 cyhalothrin < chlorpyrifos. Surprisingly, a high proportion of those knockdown was observed in  
257 both species of laboratory strains (5-100 % knockdown), for all the insecticides except  
258 imidacloprid. Less than 3 % of those knockdowns were recorded in the field population of *Ae.*  
259 *albopictus* exposed to imidacloprid at SAT 4 (1.25 %) in an IA site, and PHA 1 (2.50 %) in an  
260 NA site. The remaining populations were completely knockdown. All of the mosquito  
261 populations that were exposed to chlorpyrifos were 100 % knockdown, except for PHA 3 (76 %)  
262 which was an IA site. The percentage mortality of the laboratory (NIH) and field strains of *Ae.*  
263 *albopictus*, as well as of the laboratory strain of *Ae. aegypti* (USDA) after 24 hours of exposure  
264 to field application concentrations of chlorpyrifos, lambda-cyhalothrin, carbaryl, and  
265 imidacloprid is shown in Table 5. There was no mortality in any of the controls. Complete (100  
266 %) mortality was seen in all populations after exposure to chlorpyrifos from the organophosphate  
267 insecticide group. For the pyrethroids, the proportion of mortality recorded in all the populations  
268 following 24 hours exposure to lambda-cyhalothrin ranged between 46.23 and 81.20 %, except

269 in PHA 3, which was an IA site, and showed higher mortality (96.84 %). Among the carbamates,  
270 most of the populations exposed to carbaryl recorded mortality below 90 % (mortality range,  
271 40.00-88.73 %) although the highest mortality was recorded at SON 1 (96.05 %), which was an  
272 LA site. In the neonicotinoid group, all the mosquito populations were exposed to imidacloprid,  
273 and all the mortality rates recorded were below 11 % (0.00-10.33 %; see Table 5).

### 274 **Comparison between the susceptibility of *Aedes* mosquitoes to pyrethroid agrochemical** 275 **and public health insecticides**

276 An initial study comparing the susceptibility of *Aedes* mosquitoes between application  
277 concentrations of lambda-cyhalothrin for agrochemical (AL) and public health (PL) use, showed  
278 a higher overall proportion of mosquitoes knockdown (> 94.80 %) and mortalities (96.15 %) in  
279 all the *Aedes* populations that were exposed to lambda-cyhalothrin as applied as a public health  
280 insecticide compared to its application as an agrochemical (knockdown = 37.84-97.50 % and  
281 mortalities = 45.75-86.43 %). For the field strain of *Ae. albopictus*, a higher proportion of  
282 mosquitoes knockdown and mortality were seen at its public-health application dosage compared  
283 to its dosage as an agrochemical (Table 6).

284

285

286

## DISCUSSION

287 The objective of this study was to observe the density of *Ae. albopictus* in durian planting  
288 systems in southern Thailand and to evaluate their insecticide-resistance status. The small durian  
289 farmers who took part in the study were, however, not necessarily representative of durian  
290 cultivators in southern Thailand. A similarly designed study was conducted by de Albuquerque  
291 et al. (2018) in which ovitraps were set for 15 or 30 days near a house in the urban areas of

292 Itacoatiara and Tabatinga, in Amazonas, Brazil to examine the density of *Ae. aegypti*. That study  
293 found a positive correlation between the occurrence of dengue and the *Ae. aegypti* egg density.  
294 Previous work by Regis et al. (2008) on the density of *Ae. albopictus* determined using ovitraps  
295 placed near forested areas with high rates of disease transmission, showed that the *Aedes* egg  
296 density index (EDI) is equal to 100-750 eggs per trap.

297 Ovitrap for mosquito collection follow many designs and can be made from various kind  
298 of material. The ovitraps used in this study followed the well-known ovitrap design launched by  
299 the Center for Disease Control and Prevention in the USA, which can be made using a small  
300 metal, glass, or plastic container, often dark in color, containing water and material in which  
301 females can lay eggs. This trap, which is inexpensive and easily transportable, is mainly used to  
302 survey the population of *Aedes* mosquitoes. One drawback of the use of ovitraps is that they may  
303 become mosquito breeding sites if left for more than a week. Additionally, environmental and/or  
304 human activities may contribute mosquito breeding sites that may compete with ovitraps, thus  
305 compromising the number of eggs collected by an ovitrap (CDC 2018).

306 The insecticides used in this experiment, organophosphate (chlorpyrifos), pyrethroid  
307 (lambda-cyhalothrin), carbamate (carbaryl) and neonicotinoid (imidacloprid) were applied based  
308 on the recommended concentrations on the labels and produced active ingredient per square  
309 meter (a.i./m<sup>2</sup>) levels of 0.04, 0.001, 0.03 and 0.002 g, respectively. However, the concentrations  
310 of insecticides recommended by the WHO for public health use for mosquito control are as  
311 follows; organophosphate (fenitrothion) 2.0 g a.i./m<sup>2</sup>, pyrethroid (lambda-cyhalothrin) 0.02-0.03  
312 g a.i./m<sup>2</sup> and carbamate (propoxur) 1.0-2.0 g a.i./m<sup>2</sup>, with neonicotinoids not having yet been  
313 approved for public health use (WHO 2015). Therefore the a.i./m<sup>2</sup> recommended for agricultural  
314 purposes is much less than that approved for use in public health applications. Since mosquitoes

315 are non-target insects for agricultural insecticides, continued exposure to sub-lethal  
316 concentrations of agricultural insecticides could select for insecticide resistance in mosquito  
317 populations. This is the probable cause of the reduced mortality in the mosquito populations  
318 tested in this study for all the insecticides except chlorpyrifos.

319         However, the low knockdown and mortality rates in the mosquito populations tested may  
320 not be due to their lower insecticide susceptibility. For example imidacloprid is an insecticide in  
321 the neonicotinoid group, all of which are synthetic substances which imitate the action of  
322 nicotine. The mode of action of this insecticide group is to bind to the nicotinic acetylcholine  
323 receptor in the central nervous system, thus blocking signal transmission to nerve cells.  
324 Imidacloprid enters the insect's system by being eaten (Gervais 2010) but in this bioassay, which  
325 employed the WHO susceptibility test based on tarsal contact, the neonicotinoid was not able to  
326 enter the mosquitoes' system in order to act. Therefore it cannot be concluded that the  
327 mosquitoes in this study were resistant to imidacloprid.

328         The results of the comparisons between the susceptibility of *Aedes* mosquitoes to  
329 agrochemical and public health lambda-cyhalothrin insecticides showed that *Ae. albopictus* from  
330 the study sites were mostly susceptible to the public health dosage of lambda-cyhalothrin, with  
331 overall mortality of 96.15 %. This was in contrast to a mortality of 86.43 % for the agrochemical  
332 dosage of lambda-cyhalothrin. Further, our results showed no evidence of cross-insecticide  
333 resistance between agrochemical and public health lambda-cyhalothrin insecticides. In the future,  
334 cross-resistance between agrochemical and public health insecticides (organophosphate,  
335 pyrethroid, or carbamate) should be a required component of insecticide resistance management.

336         Overall, the populations of *Ae. albopictus* in this study were completely susceptible to  
337 chlorpyrifos but experienced reduced mortality following exposure to lambda-cyhalothrin,

338 carbaryl, and imidacloprid, which is suggestive of the existence of resistance. To the best of our  
339 knowledge, this is the first report of susceptibility tests in respect of agrochemical insecticides on  
340 wild populations of *Aedes* in southern Thailand. Previous studies have however reported the  
341 insecticide susceptibility status of *Aedes* mosquitoes against recommended public health  
342 concentrations of insecticides for vector control. Thanispong et al. (2008) reported that *Ae.*  
343 *aegypti* from Muang district, Songkhla province and Muang district, Satun province exposed to  
344 the recommended public health concentration of alpha-cypermethrin (0.05 %), deltamethrin  
345 (0.05 %), permethrin (0.25 %), and malathion (0.8 %) were both susceptible to deltamethrin,  
346 malathion, and alpha-cypermethrin. However, *Ae. aegypti* in Songkhla showed some suggestion  
347 of resistance to alpha-cypermethrin and also to permethrin. In a later study by Chuaycharoensuk  
348 et al. (2011), *Ae. albopictus* in rubber plantations from Songkhla and Chumphon provinces were  
349 susceptible to deltamethrin and lambda-cyhalothrin, while the Chumphon strain exhibited some  
350 suggestion of resistance to permethrin and the Songkhla strain were resistant to permethrin.

351

352

## CONCLUSION

353 The most commonly used groups of insecticides in durian plantations in the five  
354 provinces in southern Thailand (Chumphon, Nakhon Si Thammarat, Phattalung, Satun and  
355 Songkhla) were: organophosphate combined with a pyrethroid (chlorpyrifos + cypermethrin),  
356 followed by pyrethroid (cypermethrin and lambda-cyhalothrin), carbamate (fenobucarb,  
357 methomyl, and carbamate), organophosphate (chlorpyrifos) and neonicotinoid (imidacloprid).  
358 Frequent applications (7-15 days per month) of each insecticide for insect pest control were  
359 recorded for more than half the sample. The variation in insecticide intensity and frequency in  
360 durian plantations influenced the density of *Ae. albopictus* eggs collected by ovitraps, as well as



361 disrupting the mosquito life cycle by hindering the adult female mosquitoes from completing  
362 their gonotrophic cycle, and thus egg-laying. The number of eggs collected was significantly  
363 different ( $P < 0.05$ ) among the three durian plantation insecticide application criteria IA, LA and  
364 NA. Unsurprisingly, the highest number of eggs per trap was collected from the NA sites in  
365 which no insecticides were used, followed by the LA and IA sites, respectively.

366 Of the four groups of insecticides used in the durian plantations in this study three are  
367 also used in public health applications for vector control: organophosphate (chlorpyrifos),  
368 pyrethroids (lambda-cyhalothrin, cypermethrin) and carbamate (carbaryl), but at different  
369 concentrations, resulting in different dosages of active ingredients. Their use in durian farming  
370 may lead to the development of insecticide resistance in mosquito populations, as well as cross-  
371 resistance to public health insecticides. However, since the mosquitoes in this study were  
372 completely susceptible to chlorpyrifos, should other insecticides fail, that appears to be a good  
373 alternative for *Ae. albopictus* control.

374 Finally, the monitoring of insecticide susceptibility and the early detection of insecticide  
375 resistance should always be considered in the design and implementation of effective integrated  
376 vector management practices for the control of *Aedes*-borne diseases in Thailand.

### 377 **Conflict of interest**

378 The authors declare no conflicts of interest.

### 379 **Acknowledgments**

380 This research study was funded by a Research Grant for Thesis, from the Graduate  
381 School, and a Graduate Thesis Grant from the Faculty of Natural Resources, Prince of Songkla

382 University. The authors are grateful to the durian orchard cultivators, without whose cooperation  
383 this study would not have been possible.

384

385

#### REFERENCES CITED

386 **CDC (Centers for Disease Control and Prevention). 2018.** Surveillance and control of *Aedes*

387 *aegypti* and *Aedes albopictus* in the United States (Thai).[Internet]. Available from the

388 Centers for Disease Control and Prevention, Nonthaburi [accessed June 25, 2019].

389 <https://www.cdc.gov/chikungunya/resources/vector-control.html>.

390 **Chareonviriyaphap, T., B. Aum-aung, and S. Ratanatham. 1999.** Current insecticide

391 resistance patterns in mosquito vectors in Thailand. Southeast Asian J. Trop Med Public

392 Health. 30: 184-194.

393 **Chareonviriyaphap, T., M.J. Bangs, W. Suwonkerd, M. Kongmee, V. Corbel, and R.**

394 **Ngoen-Klan. 2013.** Review of insecticide resistance and behavioral avoidance of vectors

395 of human diseases in Thailand. Parasit Vectors. 6: 280.

396 **Chuaycharoensuk, T., W. Juntarajumnong, W. Boonyuan, M.J. Bangs, P. Akkratanakul, S.**

397 **Thammaphalo, N. Jirakanjanakit, S. Tanasinchayakul, and T. Chareonviriyaphap.**

398 **2011.** Frequency of pyrethroid resistance in *Aedes aegypti* and *Aedes albopictus* (Diptera:

399 Culicidae) in Thailand. J. Vector Ecol. 36: 204-212.

400 **Corbel, V., N.L. Achee, F. Chandre, M.B. Coulibaly, I. Dusfour, D.M. Fonseca, J. Grieco,**

401 **W. Juntarajumnong, A. Lenhart, A.J. Martins, C. Moyes, L.C. Ng, J. Pinto, K.**

402 **Raghavendra, H. Vatandoost, J. Vontas, D. Weetman, F. Fouque, R.Velayudhan,**

403 **and J.P. David. 2016.** Tracking insecticide resistance in mosquito vectors of arboviruses:

- 404 The Worldwide Insecticide resistance Network (WIN). PLoS Negl. Trop. Dis. 10:  
405 e0005054.
- 406 **DDC (Bureau of Epidemiology Department of Disease Control). 2018.** Annual Epidemiology  
407 Surveillance Report 2018(Thai) [Internet]. Available from the Ministry of Public Health,  
408 Nonthaburi. [accessed May 12, 2020].<https://apps.boe.moph.go.th/boeeng/annual.php>.
- 409 **de Albuquerque, B.C., R.C. Pinto, M. Sadahiro, V.S. Sampaio, D.B. de Castro, W.C.M.**  
410 **Terrazas, L.M. Mustafa, C.F. da Costa, R.A. Dos Passos, J.B.P. Lima, and J. U.**  
411 **Braga. 2018.** Relationship between local presence and density of *Aedes aegypti* eggs  
412 with dengue cases: a spatial analysis approach. Trop. Med. Inter. Health. 23: 1269-1279.  
413 doi: 10.1111/tmi.13150.
- 414 **Gervais, J.A., B. Luukinen, K. Buhl, and D. Stone. 2010.** Imidacloprid Technical Fact Sheet  
415 [Internet]. Available from National Pesticide Information Center, Oregon State University  
416 Extension Services [accessed May 5, 2020].  
417 <http://npic.orst.edu/factsheets/archive/imidacloprid.html>.
- 418 **Jirakanjanakit, N., P. Rongnoparut, S. Saengtharapip, T. Chareonviriyaphap, S. Duchon,**  
419 **C. Bellec, and S. Yoksan. 2007a.** Insecticide susceptible/resistance status in *Aedes*  
420 (*Stegomyia*) *aegypti* and *Aedes* (*Stegomyia*) *albopictus* (Diptera: Culicidae) in Thailand  
421 during 2003-2005. J. Econ. Entomol. 100: 545-550.
- 422 **Jirakanjanakit, N., S. Saengtharapip, P. Rongnoparut, S. Duchon, C. Bellec, and S. Yoksan.**  
423 **2007b.** Trend of temephos resistance in *Aedes* (*Stegomyia*) mosquitoes in Thailand  
424 during 2003-2005. Environ. Entomol. 36: 506-511.
- 425 **Limkittikul, K., J. Brett, and M. L'Azou. 2014.** Epidemiological trends of dengue disease in  
426 Thailand (2000-2011): a systematic literature review. PLoS Negl. Trop. Dis. 8: e3241.

- 427 **Overgaard, H.J., S.R. Sandve, and W. Suwonkerd. 2005.** Evidence of anopheline mosquito  
428 resistance to agrochemicals in northern Thailand. *Southeast Asian J. Trop. Med. Public*  
429 *Health.* 36: 152-157.
- 430 **Overgaard, H. 2006.** Malaria mosquito resistance to agricultural insecticides: risk area mapping  
431 in Thailand. Colombo, Sri Lanka: International Water Management Institute (IWMI).  
432 Research report 103.62 p. Available from Norwegian Institute for Agricultural and  
433 Environmental Research (Bioforsk), Høgskoleveien 7, 1432 Ås, Norway.
- 434 **Pethuan, S., N. Jirakanjanakit, S. Saengtharapip, T. Chareonviriyaphap, D. Kaewpa, and**  
435 **P. Rongnoparut. 2007.** Biochemical studies of insecticide resistance in *Aedes*  
436 (*Stegomyia*) *aegypti* and *Aedes* (*Stegomyia*) *albopictus* (Diptera: Culicidae) in Thailand.  
437 *Trop. Biomed.*24: 7-15.
- 438 **Ponlawat, A., J.G. Scott, and L.C. Harrington. 2005.** Insecticide susceptibility of *Aedes*  
439 *aegypti* and *Aedes albopictus* across Thailand. *J. Med. Entomol.* 42: 821-825. doi:  
440 10.1603/0022-2585(2005)042[0821:ISOAAA]2.0.CO;2.
- 441 **Regis, L., A.M. Monteiro, M.A.V. Melo-Santos, J.C.Jr. Silveira, A.F. Furtado, R.V. Acioli,**  
442 **G.M. Santos, M. Nakazawa, M.S. Carvalho, P.J.Jr . Ribeiro, and W.V. Souza. 2008.**  
443 Developing new approaches for detecting and preventing *Aedes aegypti* population  
444 outbreaks: basis for surveillance, alert and control system. *Memórias do Instituto Oswaldo*  
445 *Cruz.* 103: 50-59. doi: 10.1590/s0074-02762008000100008.
- 446 **Sullivan, M.F., D.J. Gould, and S. Maneechai. 1971.** Observations on the host range and  
447 feeding preferences of *Aedes albopictus*(Skuse). *J. Med. Entomol.* 8: 713-716.

- 448 **Tangena, J.A., P. Thammavong, A.L. Wilson, P.T. Brey, and S.W. Lindsay. 2016.** Risk and  
449 control of mosquito-borne diseases in Southeast Asian rubber plantations. Trends  
450 Parasitol. 32: 402-415.
- 451 **Tantrakonnsab, W., and N. Tantrakoonsab. 2018.** Thai Export of Durian to China. In: Kubo  
452 K, Sakata S, eds. Impact of China's Increasing Demand for Agro Produce on Agricultural  
453 Production in the Mekong Region. Chiba, Japan: Japan External Trade Organization  
454 (JETRO). P1-25.
- 455 **Thammapalo, S., W. Wonghiranrat, S. Moonmek, and W. Sriplong. 2009.** Biting time of  
456 *Aedes albopictus* in the rubber plantations and the orchard, the Southernmost of Thailand.  
457 J. Vector Borne Dis. 6: 1-6.
- 458 **Thanispong, K., S. Sathantriphop, and T. Chareonviriyaphap. 2008.** Insecticide resistance of  
459 *Aedes aegypti* and *Culex quinquefasciatus* in Thailand. J. Pestic. Sci. 33: 351-356.
- 460 **Thavara, U., A. Tawatsin, T. Pengsakul, P. Bhakdeenuan, S. Chanama, S. Anantapreecha,**  
461 **C. Molito, J. Chompoosri, S. Thammapalo, P. Sawanpanyalert, and P. Siriyasatien.**  
462 **2009.** Outbreak of chikungunya fever in Thailand and virus detection in field population  
463 of vector mosquitoes, *Aedes aegypti* (L.) and *Aedes albopictus* Skuse (Diptera:  
464 Culicidae). Southeast Asian J. Trop. Med. Public Health. 40: 951-962.
- 465 **Wanwimolruk, S., O. Kanchanamayoon, S. Boonpangrak, and V. Prachayasittikul. 2015.**  
466 Food safety in Thailand 1: it is safe to eat watermelon and durian in Thailand. Environ.  
467 Health Prev. Med. 20: 204-215 doi: 10.1007/s12199-015-0452-8.
- 468 **WHO (World Health Organization). 2015.** Indoor residual spraying: An operational manual  
469 for IRS for malaria transmission, control and elimination [Internet]. Available from the

Ratisupakorn et al. Agrochemical susceptibility in *Aedes albopictus*

22

- 470 World Health Organization, Geneva [accessed August 8, 2019].
- 471 <https://www.who.int/malaria/publications/atoz/9789241508940/en/>.
- 472 **WHO (World Health Organization). 2016.** Test procedures for insecticide resistance
- 473 monitoring in malaria vector mosquitoes [Internet]. Available from the World Health
- 474 Organization, Geneva [accessed June 25, 2019].
- 475 <https://www.who.int/malaria/publications/atoz/9789241511575/en/>.
- 476 **Yaya, N., and K. Tainchum. 2017.** Evaluation of anticoagulants in blood meal feeding for
- 477 laboratory rearing of *Aedes aegypti* (Diptera: Culicidae) (Thai)[Special problem] Prince
- 478 of Songkla University, Songkhla. 14 p.

479 **Table 1. The coordinates of the 22 durian orchards classified based on the frequency of**  
480 **insecticide application.**

481

| Durian planting system                            | No. | Site  | GPS Coordinates           |
|---------------------------------------------------|-----|-------|---------------------------|
| <b>Intensive-application of insecticides (IA)</b> | 1   | CHU 1 | 9°52'49.9"N 98°55'04.2"E  |
|                                                   | 2   | CHU 2 | 9°52'52.7"N 98°55'07.0"E  |
|                                                   | 3   | CHU 3 | 9°53'11.8"N 98°54'35.3"E  |
|                                                   | 4   | CHU 4 | 9°53'35.0"N 98°54'47.1"E  |
|                                                   | 5   | CHU 5 | 9°53'38.4"N 98°54'50.8"E  |
|                                                   | 6   | PHA 3 | 7°39'59.8"N 99°49'57.4"E  |
|                                                   | 7   | SAT 4 | 6°52'28.8"N 99°59'58.9"E  |
|                                                   | 8   | NAK 1 | 8°48'31.6"N 99°37'36.4"E  |
|                                                   | 9   | NAK 2 | 8°48'37.7"N 99°37'27.2"N  |
|                                                   | 10  | NAK 3 | 8°48'33.5"N 99°37'28.5"E  |
|                                                   | 11  | NAK 5 | 8°44'11.1"N 99°44'15.5"E  |
|                                                   | 12  | NAK 6 | 8°46'23.2"N 99°42'58.2"E  |
| <b>Less-application of insecticides (LA)</b>      | 1   | NAK 4 | 8°43'59.6"N 99°44'28.4"E  |
|                                                   | 2   | SON 1 | 6°58'14.4"N 100°19'00.3"E |
|                                                   | 3   | SON 3 | 7°00'58.0"N 100°15'28.4"E |
| <b>No application of insecticides (NA)</b>        | 1   | PHA 1 | 7°40'43.9"N 99°50'18.0"E  |
|                                                   | 2   | PHA 2 | 7°40'45.0"N 99°49'56.5"E  |
|                                                   | 3   | SAT 1 | 6°54'59.2"N 99°51'19.7"E  |
|                                                   | 4   | SAT 2 | 6°54'47.0"N 99°51'24.6"E  |
|                                                   | 5   | SAT 3 | 6°47'25.8"N 100°04'46.7"E |
|                                                   | 6   | SAT 5 | 6°52'01.2"N 100°00'23.4"E |
|                                                   | 7   | SON 2 | 6°57'17.4"N 100°16'00.9"E |

482

483

484

485

486

487 **Table 2. Demographic information of durian cultivators who participated in the study.**

488

|                                                    | <b>Participant characteristic N (%)</b> |                            |                          |                |
|----------------------------------------------------|-----------------------------------------|----------------------------|--------------------------|----------------|
|                                                    | <b>&lt; 25</b>                          | <b>26-50</b>               | <b>51-75</b>             |                |
| <b>Age (years)</b>                                 | 0 (0.00)                                | 8 (36.36)                  | 14 (63.64)               |                |
|                                                    | <b>Male</b>                             | <b>Female</b>              |                          |                |
| <b>Sex</b>                                         | 18 (81.82)                              | 4 (18.18)                  |                          |                |
|                                                    | <b>Primary school</b>                   | <b>Secondary school</b>    | <b>Bachelor's degree</b> |                |
| <b>Education</b>                                   | 10 (45.45)                              | 5 (22.73)                  | 7 (31.82)                |                |
|                                                    | <b>Farmer</b>                           | <b>Government employee</b> |                          |                |
| <b>Occupation</b>                                  | 20 (90.91)                              | 2 (9.09)                   |                          |                |
|                                                    | <b>Monoculture</b>                      | <b>Polyculture</b>         |                          |                |
| <b>Type of durian orchard</b>                      | 5 (22.73)                               | 17(77.27)                  |                          |                |
|                                                    | <b>&lt; 4</b>                           | <b>5-8</b>                 | <b>9-12</b>              | <b>&lt; 13</b> |
| <b>Size of durian orchard (rai)</b>                | 6 (27.27)                               | 7 (31.82)                  | 4 (18.18)                | 5 (22.73)      |
|                                                    | <b>Indeterminate</b>                    | <b>0-5</b>                 | <b>6-10</b>              |                |
| <b>Spacing between trees (meters)</b>              | 2 (9.09)                                | 2 (9.09)                   | 18 (81.82)               |                |
|                                                    | <b>Use</b>                              | <b>Not use</b>             |                          |                |
| <b>Insecticide</b>                                 | 15 (68.18)                              | 7 (31.82)                  |                          |                |
|                                                    | <b>1-5</b>                              | <b>6-10</b>                | <b>11-15</b>             | <b>15+</b>     |
| <b>Frequency of insecticide application (days)</b> | 0 (0.00)                                | 9 (60.00)                  | 3 (20.00)                | 3 (20.00)      |
|                                                    | <b>Yes</b>                              | <b>Never</b>               |                          |                |
| <b>Ever had <i>Aedes</i>-borne diseases</b>        | 3 (13.64)                               | 19 (86.36)                 |                          |                |

489



490 **Table 3. Type of agrochemical insecticides, their frequency of use, and the proportion of**  
491 **respondents who use them within the insecticide application systems included in**  
492 **this study.**

493

| Insecticide group              | IRAC  | Active ingredient (a.i.)   | Frequency of spraying (days) | Number of respondents (%) |
|--------------------------------|-------|----------------------------|------------------------------|---------------------------|
| pyrethroid                     | A3    | cypermethrin               | 15                           | 1(5.88)                   |
|                                | A3    | lambda-cyhalothrin         | 15                           | 2 (11.76)                 |
| organophosphate                | B1    | chlorpyrifos               | 7                            | 2 (11.76)                 |
| organophosphate+<br>pyrethroid | B1+A3 | chlorpyrifos+ cypermethrin | 7, 10                        | 4 (23.53)                 |
|                                | B1+A3 | profenofos + cypermethrin  | 10                           | 1 (5.88)                  |
| carbamate                      | A1    | fenobucarb                 | 10                           | 1 (5.88)                  |
|                                | A1    | methomyl                   | 7                            | 1 (5.88)                  |
|                                | A1    | carbaryl                   | 15                           | 1 (5.88)                  |
| neonicotinoid                  | A4    | imidacloprid               | 10, 15                       | 2 (11.76)                 |
| pyridazinone*                  |       | pyridaben                  | 7                            | 1 (5.88)                  |
| avermectin                     | 6     | abamectin                  | 10                           | 1 (5.88)                  |

494

495 Insecticide grouping is based on the Insecticide Resistance Action Committee (IRAC)  
496 classification

497 \*Herbicide

498

499 **Table 4. Percentage mosquitoes knockdown among laboratory and field strains of *Aedes***  
500 ***albopictus*, and laboratory strain of *Aedes aegypti* following 24 h exposure to field**  
501 **application concentrations of chlorpyrifos, lambda-cyhalothrin, carbaryl and**  
502 **imidacloprid.**

503

| Population | Control | Chlorpyrifos | Lambda-cyhalothrin | Carbaryl      | Imidacloprid |
|------------|---------|--------------|--------------------|---------------|--------------|
| USDA*      | 0.00    | 100.00       | 80.00 ± 4.33       | 26.67 ± 17.02 | 0.00         |
| NIH        | 0.00    | 100.00       | 76.25 ± 17.37      | 5.00 ± 4.33   | 0.00         |
| <b>IA</b>  |         |              |                    |               |              |
| SAT 4      | 0.00    | 100.00       | 41.25 ± 8.51       | 2.50 ± 2.50   | 1.25±1.25    |
| PHA 3      | 0.00    | 76.00 ± 4.62 | 91.00 ± 4.12       | 2.00 ± 1.15   | 0.00         |
| <b>LA</b>  |         |              |                    |               |              |
| NAK 4      | 0.00    | 100.00       | 68.75 ± 3.75       | 18.33 ± 15.88 | 0.00         |
| SON 1      | 0.00    | 100.00       | 65.65 ± 4.72       | 53.47 ± 12.91 | 0.00         |
| <b>NA</b>  |         |              |                    |               |              |
| SAT 5      | 0.00    | 100.00       | 80.00 ± 7.36       | 7.50 ± 2.95   | 0.00         |
| PHA 1      | 0.00    | 100.00       | 47.50 ± 4.79       | 7.50± 3.23    | 2.50 ± 1.44  |

504 IA = intensive-application of insecticides, LA = less-application of insecticides, and NA = no  
505 application of insecticides

506 \*Laboratory strain, USDA = *Ae. aegypti* and NIH = *Ae. albopictus*

507

508

509

510 **Table 5. Percentage mortality of laboratory and field strains of *Aedes albopictus*, and**  
511 **laboratory strain of *Aedes aegypti* following 24 h exposure to field application**  
512 **concentrations of chlorpyrifos, lambda-cyhalothrin, carbaryl and imidacloprid.**

513

| Populations | Control | Chlorpyrifos | Lambda-cyhalothrin | Carbaryl      | Imidacloprid |
|-------------|---------|--------------|--------------------|---------------|--------------|
| USDA*       | 0.00    | 100.00       | 62.11 ± 15.70      | 40.00 ± 24.62 | 0.00         |
| NIH         | 0.00    | 100.00       | 65.03 ± 8.53       | 57.21 ± 15.83 | 0.00         |
| IA          |         |              |                    |               |              |
| SAT 4       | 0.00    | 100.00       | 77.35 ± 4.10       | 56.62 ± 13.12 | 1.25 ± 1.25  |
| PHA 3       | 0.00    | 100.00       | 96.84 ± 2.16       | 61.29 ± 5.21  | 0.00         |
| LA          |         |              |                    |               |              |
| NAK 4       | 0.00    | 100.00       | 81.20 ± 3.45       | 52.11 ± 12.24 | 0.00         |
| SON 1       | 0.00    | 100.00       | 46.23 ± 10.68      | 96.05 ± 3.95  | 0.00         |
| NA          |         |              |                    |               |              |
| SAT 5       | 0.00    | 100.00       | 77.31 ± 5.89       | 80.15 ± 12.89 | 1.25 ± 1.25  |
| PHA 1       | 0.00    | 100.00       | 59.38 ± 8.64       | 88.73 ± 7.86  | 10.33 ± 4.56 |

514 IA = intensive-application of insecticides, LA = less-application of insecticides, and NA = no  
515 application of insecticides

516 \*Laboratory strain, USDA = *Ae. aegypti* and NIH = *Ae. albopictus*

517

518

519

520

521

522

523 **Table 6. Comparison between the susceptibility of *Aedes* mosquitoes to agrochemical and**  
524 **public health application dosages of lambda-cyhalothrin.**

525

| Population | %KD 60 minutes |        |       | %Mortality 24 hours |        |       |
|------------|----------------|--------|-------|---------------------|--------|-------|
|            | Control        | PL**   | AL*** | Control             | PL     | AL    |
| USDA*      | 0.00           | 100.00 | 66.67 | 0.00                | 100.00 | 50.00 |
| NIH        | 0.00           | 100.00 | 37.84 | 0.00                | 100.00 | 45.75 |
| IA         |                |        |       |                     |        |       |
| SAT 4      | 0.00           | 96.15  | 92.09 | 10.00               | 98.72  | 82.34 |
| PHA 3      | 0.00           | 100.00 | 88.00 | 0.00                | 100.00 | 76.00 |
| LA         |                |        |       |                     |        |       |
| NAK 4      | 0.00           | 94.87  | 82.59 | 0.00                | 100.00 | 78.95 |
| SON 2      | 0.00           | 100.00 | 92.17 | 47.50               | 98.68  | 70.62 |
| NA         |                |        |       |                     |        |       |
| SAT 5      | 2.50           | 100.00 | 97.50 | 10.00               | 97.30  | 86.43 |
| PHA 1      | 0.00           | 98.72  | 84.87 | 5.00                | 96.15  | 56.98 |

526 IA = intensive-application of insecticides, LA = less-application of insecticides, and NA = no  
527 application of insecticides

528 \*Laboratory strain, USDA = *Ae. aegypti* and NIH = *Ae. albopictus*

529 \*\*PL = lambda-cyhalothrin used as a public health insecticide for mosquito control.

530 \*\*\*AL = lambda-cyhalothrin used as an agricultural insecticide for the control of target insect  
531 pests.

532

533 **Figure legends**

534 **Figure 1** Location of durian orchards included in this study in Chumphon, Nakhon Si

535 Thammarat, Phattalung, Satun and Songkhla provinces.

536 **Figure 2** Mean number of *Aedes albopictus* eggs/ovitraps in each study site and Scheffe's

537 multiple range test between each orchard \*IA = intensive-application of insecticides, LA

538 = less-application of insecticides, and NA = no application of insecticides, the same

539 letters (a-d) are non-significantly different at  $P>0.05$ .

540 **Figure 3** Mean number of *Aedes albopictus* pupae per study site.

541

542

543

544

545

546

547

548

549

550

551

552 **Figure 1**

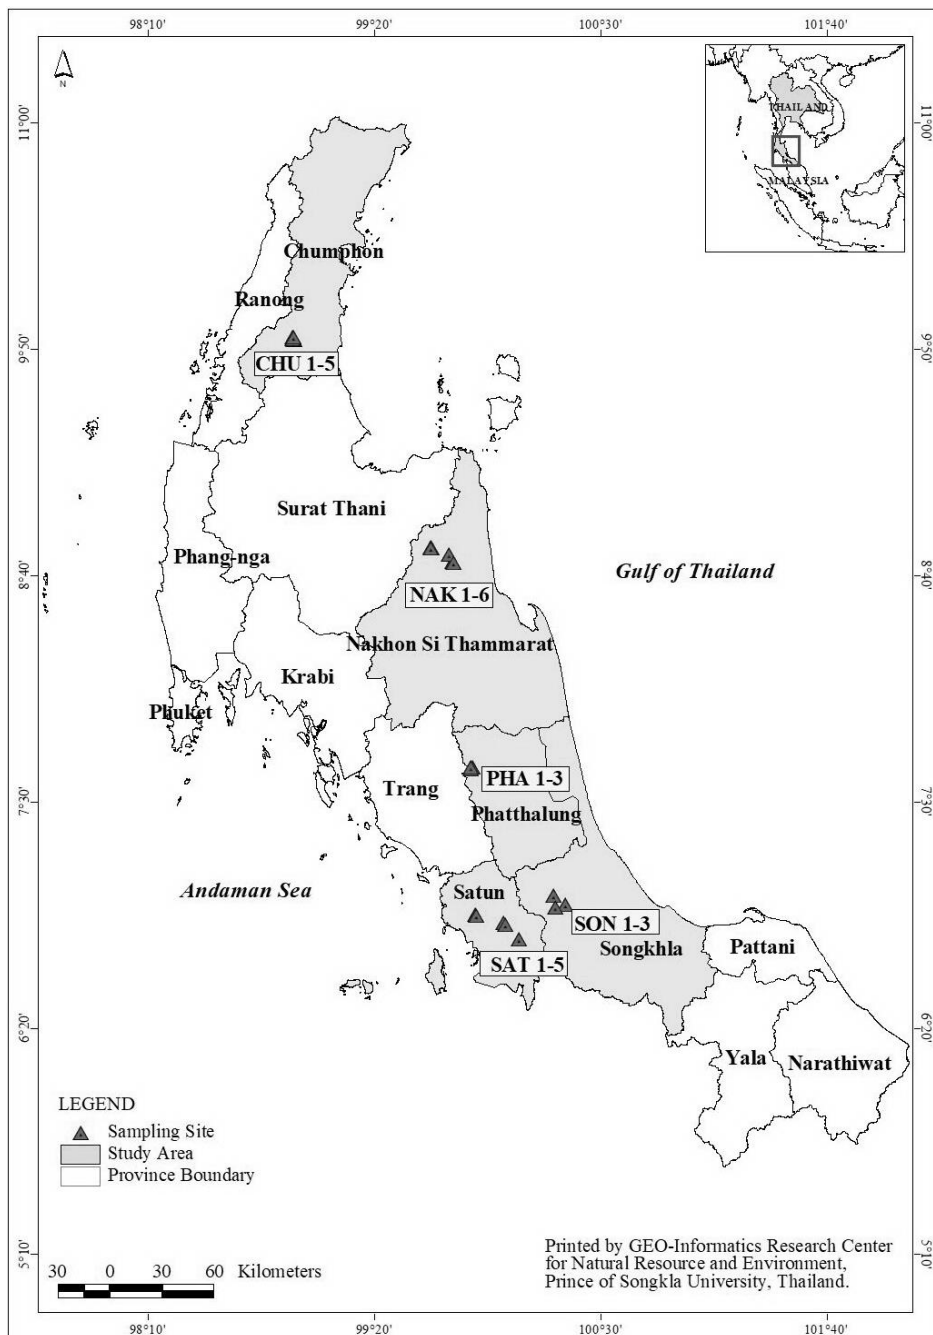

553

554

555

556

557 **Figure 2**

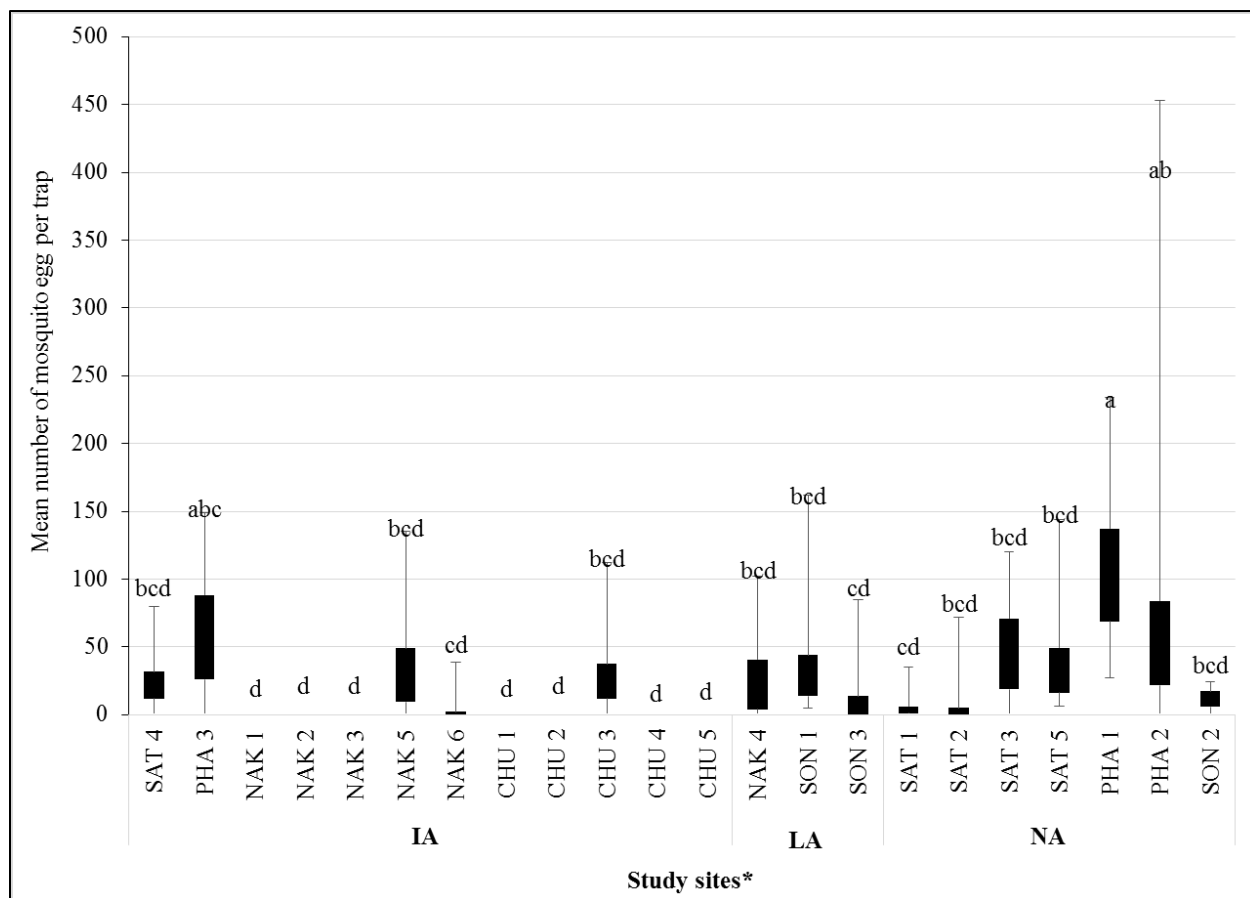

558

559

560

561

562

563

564

565

566 **Figure 3**

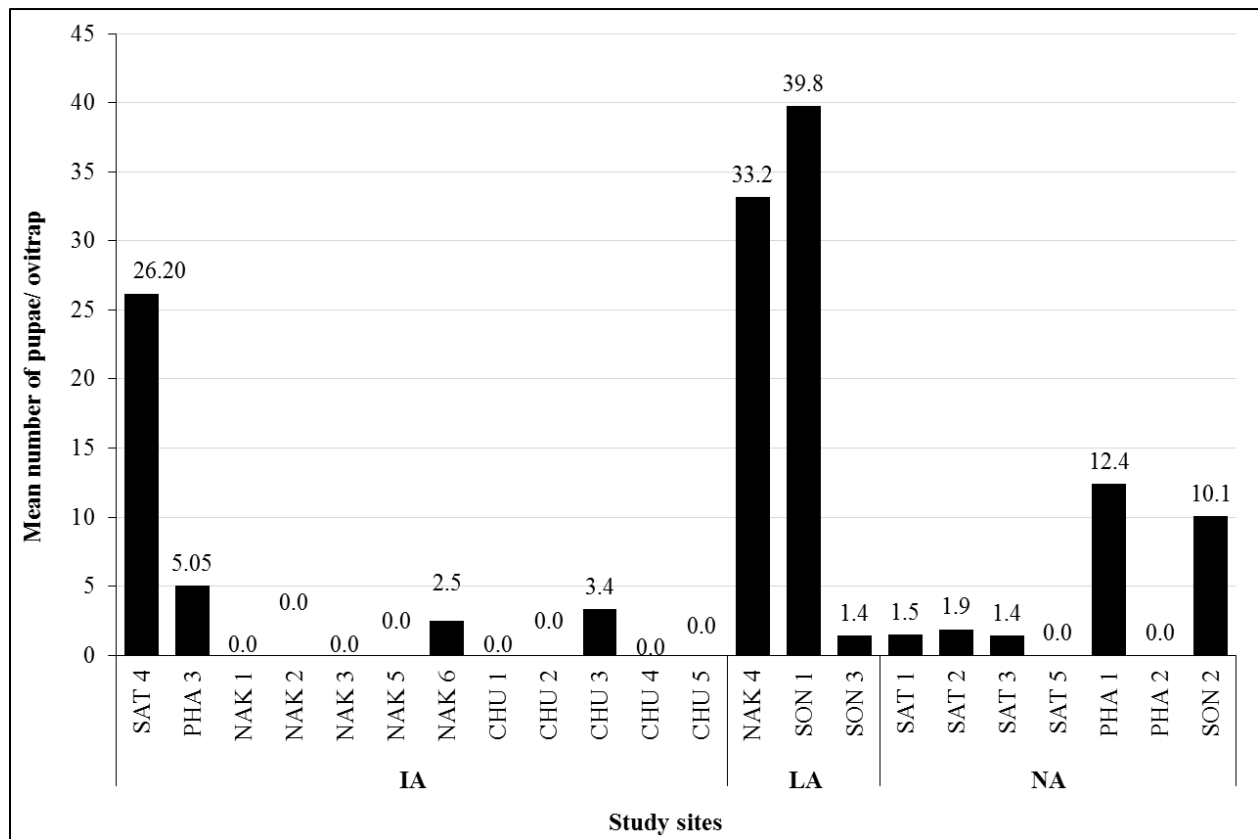

567

568
